# Supplementary material
Source: MDPI journal article supplement (https://www.mdpi.com/2073-4352/8/7/295)
Supplement: s1 [file s1]

## Supplementary material

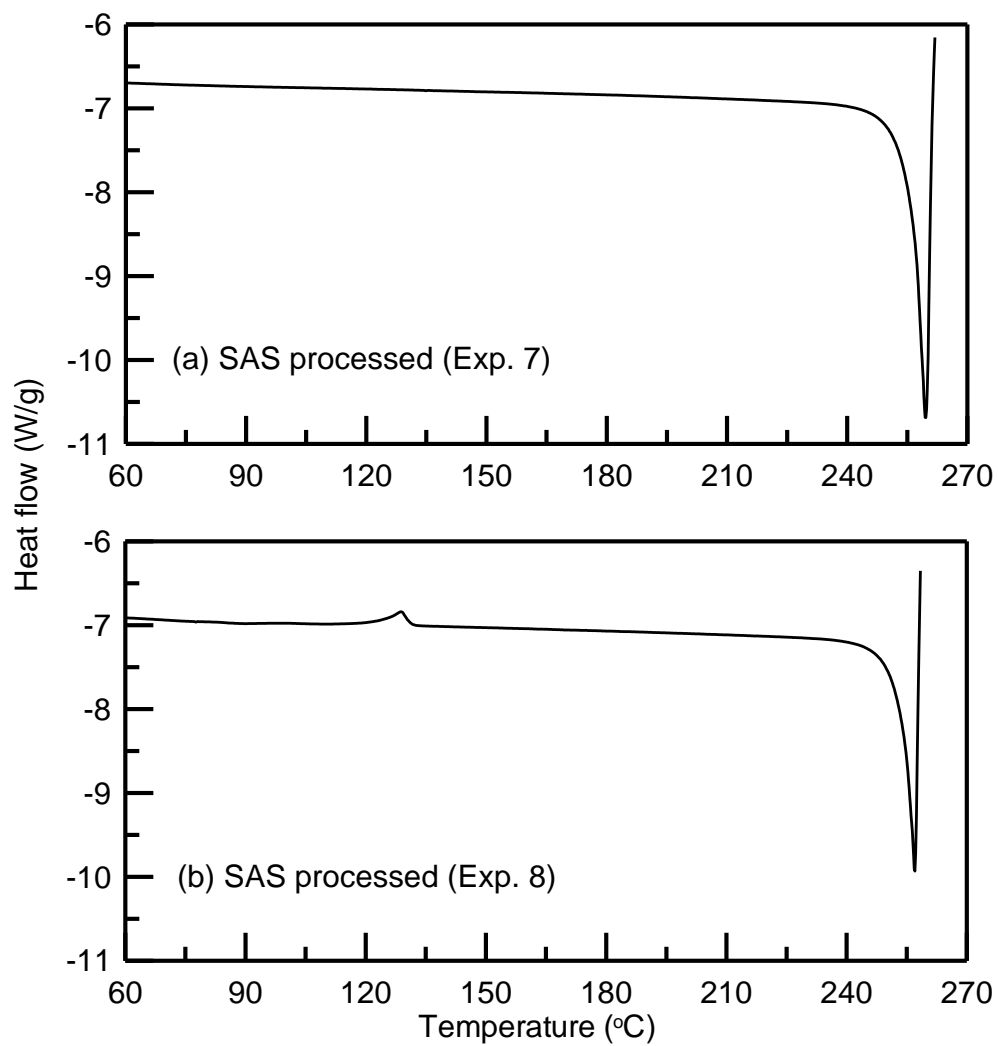

Fig. S1 DSC results of sulfasalazine crystals: (a) crystals obtained from Exp. 7 and (b) crystals obtained from Exp. 8.

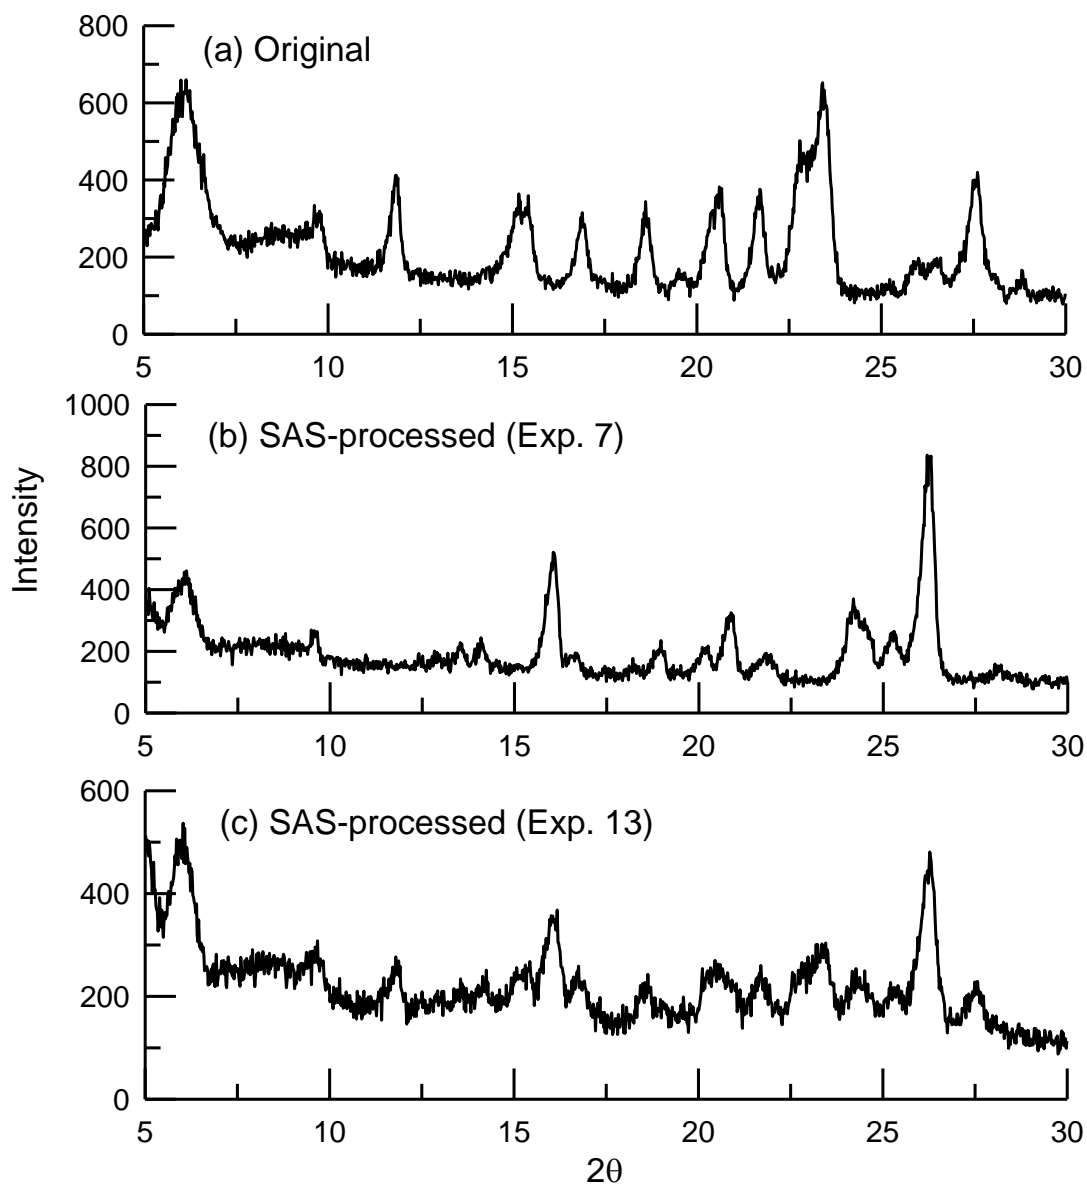

Fig. S2 PXRD results of sulfasalazine crystals: (a) original crystals as form I, (b) form II crystals obtained from Exp. 7, and (c) A form I + II mixture obtained from Exp. 13.
